# Supplementary material
Source: PubMed Central journal article supplement (PMC6627545)
Supplement: ajceu0007-0139-f5.pdf [file ajceu0007-0139-f5.pdf]

## Strain-dependent tumor microenvironment

**Table S1.** List of genes (n = 75) differentially upregulated (q < 0.05) in FVB versus C57BL/6

| C1rb          | Gm8615        | H2-Ea-ps      | Il17b         | Kcns1         |
|---------------|---------------|---------------|---------------|---------------|
| Serpina1b     | Chil1         | Gm8909        | Gm8580        | D030025P21Rik |
| 4933432I03Rik | Gm5801        | Xlr3c         | H2-Q2         | Fmmpd3        |
| AA792892      | Sorcs3        | Mrgprd        | Serpina3k     | Mup5          |
| Madcam1       | Apol11b       | Trim34b       | Ptpv          | C1s2          |
| Cyp4f37       | 4930565N06Rik | 9830107B12Rik | A930015D03Rik | Zfp949        |
| H2-Q1         | C920025E04Rik | Eno1b         | Gdpd3         | Olfr1251      |
| Fam196a       | Mir6909       | Tekt4         | Tpte          | C4a           |
| Slc6a3        | Zfp605        | Cdh16         | Gm17746       | Mmel1         |
| Gm3558        | Tmod4         | Mybph         | H2-Q10        | Ibsp          |
| Hal           | Slc24a1       | Nlrp5         | Dlx4          | Gm10653       |
| Slco4c1       | H2-T3         | Art2a-ps      | Abhd1         | AI506816      |
| Pcdhb7        | Tspan10       | Dmp1          | Vash2         | Snord49b      |
| Ppy           | Mir7063       | Apom          | Dupd1         | C330046G13Rik |
| Tbr1          | 1700008C04Rik | Scn11a        | Tcstv3        | Myh7b         |

**Table S2.** List of genes (n = 73) differentially downregulated (q < 0.05) in FVB versus C57BL/6

| Afm           | Gm14305       | Mir7688       | Fam47e        | Mucl1         |
|---------------|---------------|---------------|---------------|---------------|
| Gm14393       | 2310003N18Rik | Olfr1034      | Rbmxl2        | Gzmk          |
| D730005E14Rik | 4930481A15Rik | Tmem181b-ps   | Pakap         | Actl11        |
| 9530027J09Rik | 4930505A04Rik | 1110019D14Rik | Gm38509       | Prr9          |
| Krt33a        | Nek11         | Wfdc6b        | Amer3         | Gm16291       |
| 8030455M16Rik | Apol10a       | Gpr150        | Nps           | 4930546K05Rik |
| 4930479D17Rik | 4933427E11Rik | Gm5420        | Epha10        | Mir687        |
| Sun3          | Hist1h2bp     | Mirlet7i      | 4930473A02Rik | Fgf4          |
| Mir6970       | C130060K24Rik | Tcaf3         | 1700125H20Rik | Gipr          |
| Snord85       | 4930511A02Rik | H2-T23        | Skint4        | Skint7        |
| Lrrc72        | Zcchc13       | Ankrd53       | Gucy2d        | Slc22a22      |
| Prss52        | Med9os        | Cyp8b1        | Sez6          | 4933433H22Rik |
| Kcnj13        | Ccdc109b      | Trim12a       | Apoa2         | Gabra3        |
| C920006O11Rik | Cda           | E130008D07Rik | Ces1f         | 4930412C18Rik |
| Cd200r3       | Ttc9          | Adgb          |               |               |

## Strain-dependent tumor microenvironment

**Table S3.** Clustering of functional annotations enriched in FVB versus C57BL/6 as defined by DAVID analysis of differentially expressed genes (n = 75)

| Annotation Cluster 1 | Enrichment Score: 3.83                                                 | Count | P_Value  | Benjamini |
|----------------------|------------------------------------------------------------------------|-------|----------|-----------|
| UP_SEQ_FEATURE       | Glycosylation site: N-linked (GlcNAc...)                               | 25    | 5.70E-07 | 1.10E-04  |
| UP_SEQ_FEATURE       | Signal peptide                                                         | 21    | 2.10E-05 | 9.90E-04  |
| UP_KEYWORDS          | Signal                                                                 | 25    | 3.00E-04 | 1.70E-02  |
| UP_KEYWORDS          | Glycoprotein                                                           | 22    | 5.00E-04 | 1.90E-02  |
| UP_KEYWORDS          | Disulfide bond                                                         | 18    | 2.40E-03 | 5.20E-02  |
| UP_SEQ_FEATURE       | Disulfide bond                                                         | 15    | 2.40E-03 | 6.30E-02  |
| Annotation Cluster 2 | Enrichment Score: 3.63                                                 | Count | P_Value  | Benjamini |
| INTERPRO             | MHC classes I/II-like antigen recognition protein                      | 6     | 1.20E-06 | 2.10E-04  |
| KEGG_PATHWAY         | Graft-versus-host disease                                              | 5     | 2.40E-06 | 1.10E-04  |
| GOTERM_BP_DIRECT     | Antigen processing and presentation of peptide antigen via MHC class I | 5     | 2.40E-06 | 4.90E-04  |
| KEGG_PATHWAY         | Allograft rejection                                                    | 5     | 3.20E-06 | 7.20E-05  |
| INTERPRO             | Immunoglobulin/major histocompatibility complex, conserved site        | 6     | 3.40E-06 | 3.00E-04  |
| KEGG_PATHWAY         | Type I diabetes mellitus                                               | 5     | 4.80E-06 | 7.20E-05  |
| UP_KEYWORDS          | MHC I                                                                  | 4     | 4.90E-06 | 5.60E-04  |
| GOTERM_MF_DIRECT     | Peptide antigen binding                                                | 5     | 6.40E-06 | 7.40E-04  |
| SMART                | IGc1                                                                   | 6     | 6.60E-06 | 2.40E-04  |
| INTERPRO             | MHC class I, alpha chain, alpha1/alpha2                                | 5     | 6.70E-06 | 3.90E-04  |
| INTERPRO             | Immunoglobulin C1-set                                                  | 6     | 8.00E-06 | 3.50E-04  |
| KEGG_PATHWAY         | Autoimmune thyroid disease                                             | 5     | 8.30E-06 | 9.30E-05  |
| KEGG_PATHWAY         | Cell adhesion molecules (CAMs)                                         | 6     | 9.70E-06 | 8.70E-05  |
| GOTERM_CC_DIRECT     | MHC class I protein complex                                            | 4     | 1.10E-05 | 7.80E-04  |
| UP_SEQ_FEATURE       | Region of interest: Alpha-3                                            | 4     | 1.20E-05 | 1.10E-03  |
| KEGG_PATHWAY         | Viral myocarditis                                                      | 5     | 1.30E-05 | 9.50E-05  |
| KEGG_PATHWAY         | Antigen processing and presentation                                    | 5     | 1.50E-05 | 9.50E-05  |
| UP_SEQ_FEATURE       | Region of interest: Alpha-1                                            | 4     | 1.60E-05 | 1.00E-03  |
| UP_SEQ_FEATURE       | Region of interest: Alpha-2                                            | 4     | 1.60E-05 | 1.00E-03  |
| INTERPRO             | MHC class I-like antigen recognition                                   | 5     | 1.90E-05 | 6.50E-04  |
| UP_SEQ_FEATURE       | Domain: Ig-like C1-type                                                | 4     | 9.80E-05 | 3.70E-03  |
| UP_SEQ_FEATURE       | Region of interest: Connecting peptide                                 | 4     | 1.20E-04 | 3.60E-03  |
| GOTERM_MF_DIRECT     | TAP binding                                                            | 3     | 2.00E-04 | 1.10E-02  |
| KEGG_PATHWAY         | Phagosome                                                              | 5     | 2.80E-04 | 1.60E-03  |
| GOTERM_MF_DIRECT     | Beta-2-microglobulin binding                                           | 3     | 5.40E-04 | 2.10E-02  |
| KEGG_PATHWAY         | Herpes simplex infection                                               | 5     | 5.50E-04 | 2.80E-03  |
| GOTERM_MF_DIRECT     | T cell receptor binding                                                | 3     | 6.30E-04 | 1.80E-02  |
| UP_KEYWORDS          | Immunity                                                               | 7     | 6.60E-04 | 1.80E-02  |
| GOTERM_MF_DIRECT     | Receptor binding                                                       | 7     | 7.90E-04 | 1.80E-02  |
| GOTERM_CC_DIRECT     | Golgi medial cisterna                                                  | 3     | 9.80E-04 | 1.80E-02  |
| GOTERM_CC_DIRECT     | Endoplasmic reticulum exit site                                        | 3     | 1.20E-03 | 1.80E-02  |
| KEGG_PATHWAY         | HTLV-I infection                                                       | 5     | 1.60E-03 | 7.40E-03  |
| INTERPRO             | Immunoglobulin-like fold                                               | 10    | 2.70E-03 | 7.50E-02  |
| INTERPRO             | Immunoglobulin-like domain                                             | 9     | 3.30E-03 | 7.80E-02  |
| KEGG_PATHWAY         | Epstein-Barr virus infection                                           | 4     | 7.60E-03 | 3.10E-02  |
| KEGG_PATHWAY         | Viral carcinogenesis                                                   | 4     | 9.20E-03 | 3.40E-02  |
| KEGG_PATHWAY         | Endocytosis                                                            | 4     | 1.50E-02 | 5.20E-02  |
| GOTERM_MF_DIRECT     | Peptide binding                                                        | 3     | 2.60E-02 | 4.00E-01  |
| GOTERM_MF_DIRECT     | Protein heterodimerization activity                                    | 4     | 1.60E-01 | 8.90E-01  |
| GOTERM_BP_DIRECT     | Immune response                                                        | 3     | 1.60E-01 | 1.00E+00  |
| GOTERM_CC_DIRECT     | Golgi apparatus                                                        | 6     | 2.30E-01 | 8.80E-01  |
| GOTERM_CC_DIRECT     | Cell surface                                                           | 4     | 2.50E-01 | 8.80E-01  |
| GOTERM_CC_DIRECT     | Endoplasmic reticulum                                                  | 6     | 3.00E-01 | 8.80E-01  |
| GOTERM_MF_DIRECT     | Poly(A) RNA binding                                                    | 4     | 5.80E-01 | 1.00E+00  |

## Strain-dependent tumor microenvironment

| Annotation Cluster 3 |                                   | Enrichment Score: 3.48 | Count | P_Value  | Benjamini |
|----------------------|-----------------------------------|------------------------|-------|----------|-----------|
| UP_SEQ_FEATURE       | Signal peptide                    |                        | 21    | 2.10E-05 | 9.90E-04  |
| GOTERM_CC_DIRECT     | Extracellular region              |                        | 15    | 2.00E-04 | 7.40E-03  |
| GOTERM_CC_DIRECT     | Extracellular space               |                        | 13    | 6.40E-04 | 1.60E-02  |
| UP_KEYWORDS          | Secreted                          |                        | 12    | 4.30E-03 | 7.80E-02  |
| Annotation Cluster 4 |                                   | Enrichment Score: 0.93 | Count | P_Value  | Benjamini |
| UP_SEQ_FEATURE       | Transmembrane region              |                        | 19    | 1.20E-02 | 2.50E-01  |
| UP_SEQ_FEATURE       | Topological domain: Extracellular |                        | 12    | 2.10E-02 | 3.50E-01  |
| UP_SEQ_FEATURE       | Topological domain: Cytoplasmic   |                        | 13    | 4.60E-02 | 5.90E-01  |
| UP_KEYWORDS          | Transmembrane helix               |                        | 24    | 1.20E-01 | 8.40E-01  |
| UP_KEYWORDS          | Transmembrane                     |                        | 24    | 1.30E-01 | 8.20E-01  |
| GOTERM_CC_DIRECT     | Integral component of membrane    |                        | 23    | 2.30E-01 | 9.00E-01  |
| UP_KEYWORDS          | Membrane                          |                        | 27    | 2.50E-01 | 9.50E-01  |
| GOTERM_CC_DIRECT     | Plasma membrane                   |                        | 14    | 6.00E-01 | 9.90E-01  |
| GOTERM_CC_DIRECT     | Membrane                          |                        | 19    | 6.80E-01 | 1.00E+00  |
| Annotation Cluster 5 |                                   | Enrichment Score: 0.6  | Count | P_Value  | Benjamini |
| UP_SEQ_FEATURE       | Active site: Charge relay system  |                        | 3     | 9.30E-02 | 7.80E-01  |
| UP_KEYWORDS          | Hydrolase                         |                        | 8     | 1.40E-01 | 8.20E-01  |
| GOTERM_MF_DIRECT     | Hydrolase activity                |                        | 7     | 2.30E-01 | 9.50E-01  |
| GOTERM_MF_DIRECT     | Peptidase activity                |                        | 3     | 4.10E-01 | 1.00E+00  |
| UP_KEYWORDS          | Protease                          |                        | 3     | 4.20E-01 | 9.90E-01  |
| GOTERM_BP_DIRECT     | Proteolysis                       |                        | 3     | 4.60E-01 | 1.00E+00  |
| Annotation Cluster 6 |                                   | Enrichment Score: 0.29 | Count | P_Value  | Benjamini |
| GOTERM_BP_DIRECT     | Ion transport                     |                        | 3     | 4.60E-01 | 1.00E+00  |
| UP_KEYWORDS          | Ion transport                     |                        | 3     | 4.90E-01 | 9.90E-01  |
| GOTERM_BP_DIRECT     | Transport                         |                        | 6     | 5.40E-01 | 1.00E+00  |
| UP_KEYWORDS          | Transport                         |                        | 6     | 5.70E-01 | 1.00E+00  |
| Annotation Cluster 7 |                                   | Enrichment Score: 0.11 | Count | P_Value  | Benjamini |
| UP_KEYWORDS          | Metal-binding                     |                        | 10    | 5.50E-01 | 1.00E+00  |
| GOTERM_MF_DIRECT     | Metal ion binding                 |                        | 7     | 9.10E-01 | 1.00E+00  |
| UP_KEYWORDS          | Zinc                              |                        | 4     | 9.30E-01 | 1.00E+00  |
| Annotation Cluster 8 |                                   | Enrichment Score: 0.05 | Count | P_Value  | Benjamini |
| GOTERM_CC_DIRECT     | Intracellular                     |                        | 4     | 8.30E-01 | 1.00E+00  |
| UP_KEYWORDS          | Zinc                              |                        | 4     | 9.30E-01 | 1.00E+00  |
| UP_KEYWORDS          | Zinc-finger                       |                        | 3     | 9.30E-01 | 1.00E+00  |

## Strain-dependent tumor microenvironment

**Table S4.** Clustering of functional annotations enriched in C57BL/6 versus FVB as defined by DAVID analysis of differentially expressed genes (n=73)

| Annotation Cluster 1 | Enrichment Score: 1.17                   | Count | P_Value  | Benjamini |
|----------------------|------------------------------------------|-------|----------|-----------|
| UP_SEQ_FEATURE       | Signal peptide                           | 15    | 3.00E-04 | 2.80E-02  |
| UP_SEQ_FEATURE       | Domain: Ig-like C1-type                  | 3     | 1.70E-03 | 8.10E-02  |
| UP_KEYWORDS          | Signal                                   | 18    | 9.40E-03 | 6.10E-01  |
| UP_SEQ_FEATURE       | Topological domain: Extracellular        | 10    | 1.10E-02 | 3.10E-01  |
| UP_SEQ_FEATURE       | Transmembrane region                     | 14    | 2.00E-02 | 3.30E-01  |
| UP_SEQ_FEATURE       | Disulfide bond                           | 10    | 2.20E-02 | 3.00E-01  |
| UP_KEYWORDS          | Disulfide bond                           | 12    | 5.80E-02 | 9.50E-01  |
| GOTERM_CC_DIRECT     | Integral component of membrane           | 19    | 9.90E-02 | 1.00E+00  |
| UP_SEQ_FEATURE       | Topological domain: Cytoplasmic          | 9     | 1.10E-01 | 8.00E-01  |
| UP_SEQ_FEATURE       | Glycosylation site: N-linked (GlcNAc...) | 10    | 1.40E-01 | 8.50E-01  |
| UP_KEYWORDS          | Transmembrane helix                      | 19    | 1.90E-01 | 1.00E+00  |
| UP_KEYWORDS          | Transmembrane                            | 19    | 1.90E-01 | 1.00E+00  |
| UP_KEYWORDS          | Alternative splicing                     | 14    | 2.00E-01 | 9.70E-01  |
| INTERPRO             | Immunoglobulin-like domain               | 4     | 2.80E-01 | 1.00E+00  |
| INTERPRO             | Immunoglobulin-like fold                 | 4     | 3.80E-01 | 1.00E+00  |
| GOTERM_CC_DIRECT     | Membrane                                 | 16    | 4.10E-01 | 1.00E+00  |
| UP_SEQ_FEATURE       | Splice variant                           | 10    | 4.20E-01 | 1.00E+00  |
| UP_KEYWORDS          | Glycoprotein                             | 10    | 4.20E-01 | 1.00E+00  |
| UP_KEYWORDS          | Membrane                                 | 20    | 4.80E-01 | 1.00E+00  |
| Annotation Cluster 2 | Enrichment Score: 0.99                   | Count | P_Value  | Benjamini |
| UP_SEQ_FEATURE       | Domain: Ig-like V-type                   | 3     | 1.50E-02 | 3.00E-01  |
| UP_KEYWORDS          | Immunoglobulin domain                    | 3     | 2.70E-01 | 9.90E-01  |
| INTERPRO             | Immunoglobulin-like domain               | 4     | 2.80E-01 | 1.00E+00  |
| Annotation Cluster 3 | Enrichment Score: 0.71                   | Count | P_Value  | Benjamini |
| UP_SEQ_FEATURE       | Topological domain: Extracellular        | 10    | 1.10E-02 | 3.10E-01  |
| GOTERM_CC_DIRECT     | Plasma membrane                          | 9     | 7.90E-01 | 1.00E+00  |
| UP_KEYWORDS          | Cell membrane                            | 7     | 8.30E-01 | 1.00E+00  |
| Annotation Cluster 4 | Enrichment Score: 0.38                   | Count | P_Value  | Benjamini |
| GOTERM_BP_DIRECT     | Ion transport                            | 3     | 3.00E-01 | 1.00E+00  |
| UP_KEYWORDS          | Ion transport                            | 3     | 3.80E-01 | 1.00E+00  |
| GOTERM_BP_DIRECT     | Transport                                | 5     | 4.50E-01 | 1.00E+00  |
| UP_KEYWORDS          | Transport                                | 5     | 5.80E-01 | 1.00E+00  |
| Annotation Cluster 5 | Enrichment Score: 0.3                    | Count | P_Value  | Benjamini |
| INTERPRO             | Protein kinase, catalytic domain         | 3     | 2.70E-01 | 1.00E+00  |
| INTERPRO             | Protein kinase-like domain               | 3     | 3.00E-01 | 1.00E+00  |
| GOTERM_MF_DIRECT     | Protein kinase activity                  | 3     | 3.10E-01 | 1.00E+00  |
| GOTERM_MF_DIRECT     | Nucleotide binding                       | 4     | 7.90E-01 | 1.00E+00  |
| GOTERM_MF_DIRECT     | ATP binding                              | 3     | 8.40E-01 | 1.00E+00  |
| UP_KEYWORDS          | Nucleotide-binding                       | 3     | 8.90E-01 | 1.00E+00  |
| Annotation Cluster 6 | Enrichment Score: 0.14                   | Count | P_Value  | Benjamini |
| GOTERM_CC_DIRECT     | Intracellular                            | 5     | 3.90E-01 | 1.00E+00  |
| UP_KEYWORDS          | Zinc                                     | 4     | 8.30E-01 | 1.00E+00  |
| UP_KEYWORDS          | Zinc-finger                              | 3     | 8.50E-01 | 1.00E+00  |
| UP_KEYWORDS          | Metal-binding                            | 6     | 8.60E-01 | 1.00E+00  |
| GOTERM_MF_DIRECT     | Metal ion binding                        | 6     | 8.70E-01 | 1.00E+00  |

## Strain-dependent tumor microenvironment

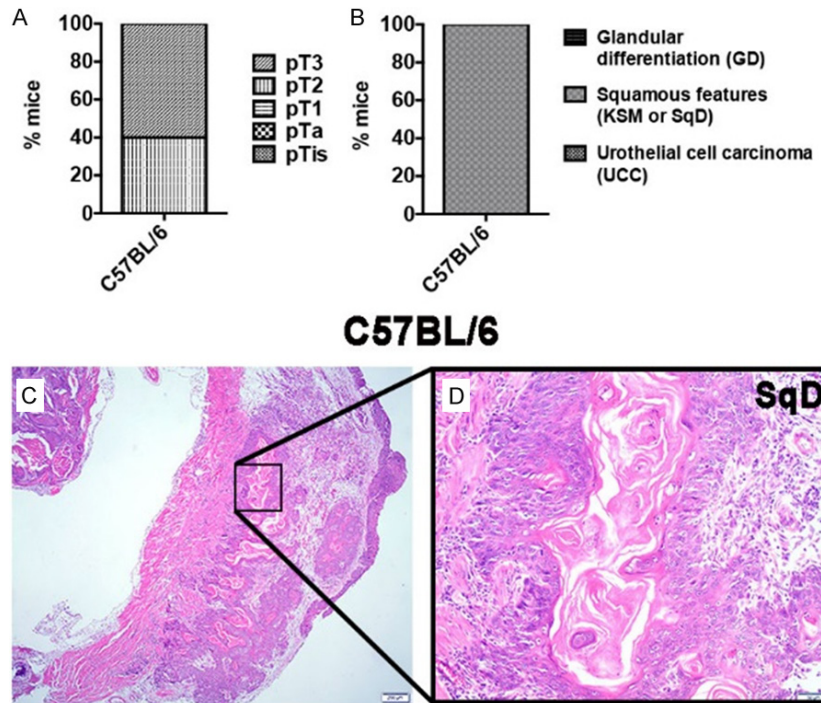

**Figure S1.** C57BL/6 Mice Develop Advanced Bladder Cancer with Squamous Morphologic Variants upon 20 Weeks of BBN. A. Quantification of percentage of C57BL/6 (n = 5) mice at different tumor stages pT2 (n = 2) and pT3 (n = 3) at 20 weeks of BBN exposure. B. Percentage of C57BL/6 (n = 5) mice per morphologic variant at 20 weeks of BBN exposure: all mice developed squamous elements. C. H&E of C57BL/6 bladders showing invasive UCC admixed with SqD in the presence of intracellular bridging and keratin deposition. D. Inset of C showing squamous differentiation.

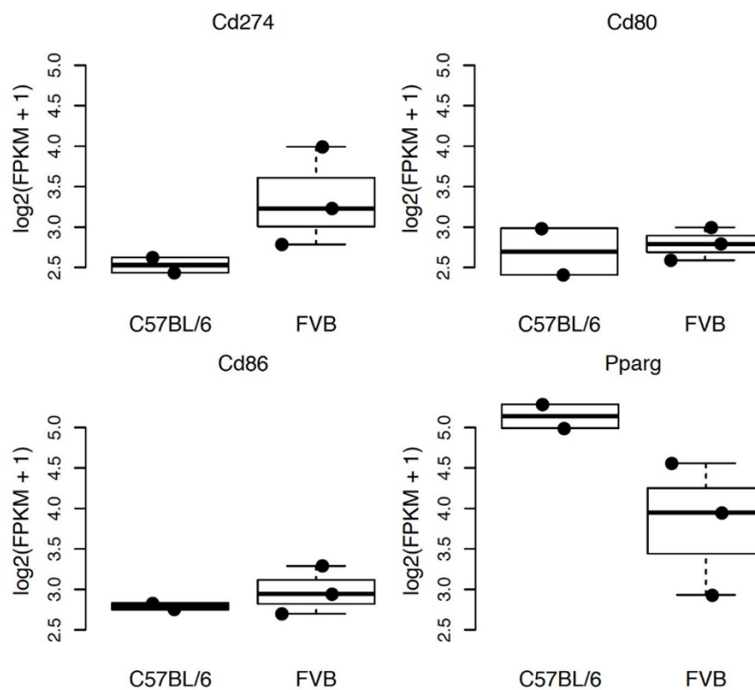

**Figure S2.** BBN-Induced Bladder Tumors in FVB Mice Exhibit an Increased Level of Transcripts of Cd274 (Pdl-1). Boxplot analysis of absolute expression of transcript levels of Cd274/Pdl-1, Cd80, Cd86 and Pparg in C57BL/6 and FVB bladders exposed to BBN for 12 weeks. Each dot represents one animal.

## Strain-dependent tumor microenvironment

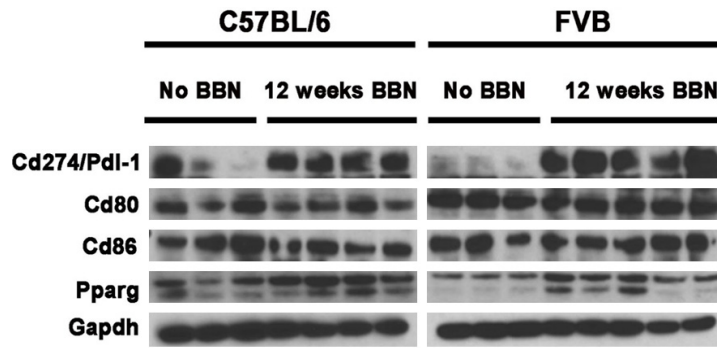

**Figure S3.** BBN Induces Inflammatory Response in C57BL/6 and FVB Mice. Western blot of the immune checkpoints (Cd274/PdL-1, Cd80 and Cd86), Pparg, and Gapdh loading control in normal urothelium (no BBN) versus tumors (12 weeks BBN) in C57BL/6 and FVB mice. Each lane represents one bladder: C57BL/6 no BBN (n = 3) and 12 weeks BBN (n = 4); and FVB no BBN (n = 3) and 12 weeks BBN (n = 5).
